# Supplementary material
Source: publisher site journal article supplement (https://www.dovepress.com/article/489605)
Supplement: Supplementary file 1 [file get_supplementary_file.php]

**Supplementary Table 1.** Baseline characteristics of patients with Lp(a)< 30 and ≥30 mg/dL.

|  | Lp(a)< 30mg/dL  (n = 345) | Lp(a)≥ 30mg/dL  (n = 81) | p-value |
| --- | --- | --- | --- |
| **Demographic characteristics** | | | |
| Age (years) | 58.4 ± 12.8 | 59.7 ± 11.6 | 0.412 |
| Age≥60 years, n (%) | 152 (44.1) | 40 (49.4) | 0.458 |
| Male, n (%) | 197 (57.1) | 43 (53.1) | 0.595 |
| BMI (kg/m2) | 24.6 ± 3.7 | 24.2 ± 3.9 | 0.376 |
| BMI ≥ 25 kg/m2, n (%) | 141 (40.9) | 32 (39.5) | 0.921 |
| Low education, n (%) | 284 (82.3) | 75 (92.6) | 0.034 |
| **Medical history and Clinical condition** | | | |
| Duration of diabetes (years) | 6.0 (1.0, 10.0) | 7.0 (3.0, 10.0) | 0.298 |
| Hypertension, n (%) | 165 (47.8) | 35 (43.2) | 0.532 |
| DR, n (%) | 91 (28.7) | 22 (30.6) | 0.866 |
| DN, n (%) | 45 (13.0) | 10 (12.3) | 1.000 |
| DPN, n (%) | 156 (45.2) | 31 (38.3) | 0.313 |
| CAD, n (%) | 24 (7.0) | 5 (6.2) | 0.994 |
| Stroke, n (%) | 14 (4.1) | 5 (6.2) | 0.596 |
| CVD, n (%) | 37 (10.7) | 9 (11.1) | 1.000 |
| Anemia, n (%) | 63 (18.5) | 21 (25.9) | 0.175 |
| **Laboratory examination** | | | |
| Lp(a) (mg/dL) | 7.00(3.60, 13.00) | 52.90(41.10, 86.10) | <0.001 |
| TG (mmol/L) | 1.72(1.08, 2.62) | 1.51(1.08, 2.19) | 0.181 |
| TG ≥1.7 mmol/L, n (%) | 176 (51.3) | 35 (43.2) | 0.235 |
| TC (mmol/L) | 5.09 ± 1.46 | 5.38 ± 1.53 | 0.114 |
| LDL-C (mmol/L) | 3.17 ± 1.00 | 3.45 ± 1.11 | 0.027 |
| HDL-C (mmol/L) | 1.12 ± 0.39 | 1.16 ± 0.25 | 0.313 |
| non-HDL-C (mmol/L) | 3.98 ± 1.43 | 4.22 ± 1.48 | 0.174 |
| apoprotein A | 1.31 ± 0.35 | 1.31 ± 0.26 | 0.866 |
| apoprotein B | 0.99 ± 0.31 | 1.09 ± 0.36 | 0.014 |
| FBG (mmol/L) | 8.73 ± 3.51 | 8.45 ± 2.87 | 0.500 |
| 2hPBG (mmol/L) | 11.79 ± 4.24 | 10.88 ± 3.82 | 0.081 |
| HbA1C (%) | 9.75 ± 2.28 | 9.96 ± 2.44 | 0.474 |
| eGFR (ml/min/1.73m2) | 92.08 ± 23.35 | 89.09 ± 24.04 | 0.304 |
| hs-CRP (mg/L) | 1.50(0.70, 3.00) | 1.70(0.70, 3.50) | 0.445 |
| **Medication** | | | |
| Insulin, n (%) | 60 (17.8) | 16 (20.0) | 0.767 |
| Sulfonylureas, n (%) | 75 (22.2) | 16 (20.0) | 0.783 |
| Glinides, n (%) | 51 (15.1) | 13 (16.2) | 0.931 |
| AGIs, n (%) | 114 (33.7) | 34 (42.5) | 0.179 |
| Metformin, n (%) | 160 (47.3) | 40 (50.0) | 0.761 |
| TZDs, n (%) | 31 (9.2) | 10 (12.5) | 0.490 |
| DPP-4 inhibitors, n (%) | 32 (9.5) | 14 (17.5) | 0.062 |
| GLP1-RAs, n (%) | 17 (5.0) | 3 (3.8) | 0.849 |
| SGLT-2is, n (%) | 32 (9.5) | 8 (10.0) | 1.000 |
| Statin, n (%) | 44 (13.7) | 15 (20.8) | 0.174 |
| Aspirin, n (%) | 23 (7.1) | 10 (13.9) | 0.103 |

Abbreviations: BMI: body mass index; DR: diabetic retinopathy; DN: diabetic nephropathy; DPN: diabetic peripheral neuropathy; CAD: coronary artery disease; CVD: cardiovascular disease; Lp(a): lipoprotein(a); TG: triglyceride; TC: total cholesterol; LDL-C: low-density lipoprotein cholesterol; HDL-C: high-density lipoprotein cholesterol; non-HDL-C: non-high-density lipoprotein cholesterol; FBG: fasting blood glucose; 2hPBG: 2 hours postprandial blood glucose; HbA1c: glycosylated hemoglobin; eGFR: estimated glomerular filtration rate; hs-CRP: hypersensitive C-reactive protein; AGIs: alpha-glucosidase inhibitors; TZDs: thiazolidinediones; DPP-4: Dipeptidyl peptidase-4; GLP1-RAs: glucagon-like peptide-1 receptor agonists; SGLT-2is: sodium-glucose cotransporter-2 inhibitors.

**Supplementary Table 2.** Univariable logistic regression analysis for variables and sarcopenia in total patients.

|  | OR (95%CI) | p-value |
| --- | --- | --- |
| Age | 1.11(1.08-1.14) | <0.001 |
| Age≥60 | 5.86(3.75-9.31) | <0.001 |
| Male | 1.30(0.86-1.98) | 0.213 |
| BMI | 0.77(0.71-0.83) | <0.001 |
| BMI ≥ 25 kg/m2 | 0.23(0.14-0.38) | <0.001 |
| Low Education | 2.14(1.16-4.23) | 0.021 |
| Duration of diabetes | 1.05(1.02-1.08) | 0.001 |
| Hypertension | 1.46(0.97-2.20) | 0.073 |
| DR | 1.84(1.15-2.94) | 0.010 |
| DN | 1.66(0.92-2.96) | 0.086 |
| DPN | 1.23(0.82-1.86) | 0.320 |
| CAD | 3.35(1.56-7.40) | 0.002 |
| Stroke | 2.51(0.99-6.46) | 0.051 |
| CVD | 2.92(1.57-5.48) | 0.001 |
| Anemia | 3.03(1.86-4.97) | <0.001 |
| Lp(a) | 1.01(1.00-1.02) | 0.016 |
| Lp(a)≥ 30 mg/dL | 1.86(1.13-3.06) | 0.014 |
| TG | 0.71(0.58-0.85) | <0.001 |
| TG ≥1.7 mmol/L | 0.49(0.32-0.74) | 0.001 |
| TC | 0.89(0.77-1.03) | 0.118 |
| LDL-C | 0.86(0.70-1.06) | 0.161 |
| HDL-C | 1.16(0.66-2.04) | 0.593 |
| non-HDL-C | 0.86(0.68-1.08) | 0.217 |
| apoprotein A | 1.22(0.66-2.24) | 0.516 |
| apoprotein B | 0.64(0.33-1.22) | 0.181 |
| FBG | 0.99(0.93-1.06) | 0.836 |
| 2hPBG | 1.11(1.06-1.17) | <0.001 |
| HbA1C | 1.08(0.98-1.18) | 0.113 |
| eGFR | 0.98(0.97-0.99) | <0.001 |
| hs-CRP | 1.03(1.01-1.05) | 0.013 |
| Insulin | 2.28(1.36-3.79) | 0.002 |
| Sulfonylureas | 1.21(0.73-1.97) | 0.455 |
| Glinides | 1.67(0.96-2.88) | 0.068 |
| AGIs | 1.49(0.97-2.29) | 0.066 |
| Metformin | 0.89(0.58-1.34) | 0.564 |
| TZDs | 0.81(0.38-1.62) | 0.557 |
| DPP-4 inhibitors | 0.87(0.43-1.68) | 0.686 |
| GLP1-RAs | 1.22(0.45-3.05) | 0.682 |
| SGLT-2is | 0.62(0.27-1.30) | 0.232 |
| Statin | 1.10(0.60-1.97) | 0.752 |
| Aspirin | 1.77(0.84-3.65) | 0.123 |

Abbreviations: BMI: body mass index; DR: diabetic retinopathy; DN: diabetic nephropathy; DPN: diabetic peripheral neuropathy; CAD: coronary artery disease; CVD: cardiovascular disease; Lp(a): lipoprotein(a); TG: triglyceride; TC: total cholesterol; LDL-C: low-density lipoprotein cholesterol; HDL-C: high-density lipoprotein cholesterol; non-HDL-C: non-high-density lipoprotein cholesterol; FBG: fasting blood glucose; 2hPBG: 2 hours postprandial blood glucose; HbA1c: glycosylated hemoglobin; eGFR: estimated glomerular filtration rate; hs-CRP: hypersensitive C-reactive protein; AGIs: alpha-glucosidase inhibitors; TZDs: thiazolidinediones; DPP-4: Dipeptidyl peptidase-4; GLP1-RAs: glucagon-like peptide-1 receptor agonists; SGLT-2is: sodium-glucose cotransporter-2 inhibitors.

**Supplementary Table 3.** Multivariable logistic regression analysis for variables and sarcopenia in model 3.

|  | OR (95%CI) | p-value |
| --- | --- | --- |
| Lp(a)≥ 30 mg/dL | 2.19(1.09-4.39) | 0.027 |
| Age ≥ 60 years | 2.82(1.46-5.53) | 0.002 |
| Male | 2.20(1.21-4.07) | 0.011 |
| BMI ≥ 25 kg/m2 | 0.18(0.09-0.35) | <0.001 |
| Low Education | 2.02(0.83-5.29) | 0.133 |
| Duration of diabetes | 0.98(0.94-1.03) | 0.530 |
| DR | 1.45(0.76-2.75) | 0.260 |
| CVD | 1.71(0.72-4.02) | 0.220 |
| Hypertension | 1.65(0.87-3.13) | 0.125 |
| Anemia | 1.18(0.57-2.41) | 0.653 |
| eGFR | 0.99(0.98-1.01) | 0.225 |
| TG ≥1.7 mmol/L | 0.42(0.22-0.75) | 0.004 |
| hs-CRP | 1.01(0.98-1.04) | 0.571 |
| 2hPBG | 1.15(1.08-1.23) | <0.001 |
| insulin | 1.71(0.79-3.70) | 0.170 |

Abbreviations: Lp(a): lipoprotein(a); BMI: body mass index; DR: diabetic retinopathy; CVD: cardiovascular disease; eGFR: estimated glomerular filtration rate; hs-CRP: hypersensitive C-reactive protein; TG: triglyceride; 2hPBG: 2 hours postprandial blood glucose.
